# Supplementary material for: miR-71 and miR-263 Jointly Regulate Target Genes Chitin synthase and Chitinase to Control Locust Molting
Source: PLoS Genet. 2016 Aug 17;12(8):e1006257. doi: 10.1371/journal.pgen.1006257 (PMC4988631; doi:10.1371/journal.pgen.1006257)
Supplement: S1 Table — (XLSX) [file pgen.1006257.s009.xlsx]

## Sheet: Sheet1
Table S1. miRNAs identified in the integument of Locusta migratoria and contained the potential binding site with CHS1 as predicted by the miRanda software
miRNA	Binding site	Score of conserved sites	Energy of conserved site (kCal/Mol)
miR-252	CHS1-3’UTR	156	-15.01
miR-927	CHS1-3’UTR	153	-8.93
miR-12	CHS1-3’UTR	144	-12.64
miR-9b	CHS1-coding	140	-10.48
miR-190	CHS1-coding	156	-9.56
miR-305	CHS1-coding	142	-11.88
miR-34	CHS1-coding	144	-20.88
miR-275	CHS1-coding	157	-26.94
miR-2	CHS1-coding	151	-22.44
miR-7	CHS1-coding	153	-19.04
miR-71	CHS1-coding	149	-19.08
miR-13a	CHS1-coding	143	-15.81
miR-306	CHS1-coding	155	-19.45
